# Supplementary material for: Isoform-level ribosome occupancy estimation guided by transcript abundance with Ribomap
Source: PubMed Central journal article supplement — Bioinformatics. 2016 Feb 15;32(12):1880–2. doi: 10.1093/bioinformatics/btw085 (PMC4908323; doi:10.1093/bioinformatics/btw085), 2016-02-15
Supplement: supp_btw085_ribomap_si.pdf [file supp_btw085_ribomap_si.pdf]

# Supplementary Information: Isoform-level Ribosome Occupancy Estimation Guided by Transcript Abundance with Ribomap

Hao Wang<sup>1</sup>, Joel McManus<sup>1,2</sup>, Carl Kingsford<sup>1,\*</sup>

**1 Computational Biology Department, School of Computer Science, Carnegie Mellon University, Pittsburgh, Pennsylvania, United States of America**

**2 Department of Biological Sciences, Carnegie Mellon University, Pittsburgh, Pennsylvania, United States of America**

\* E-mail: carlk@cs.cmu.edu

## 1. More details on the Ribomap pipeline

### 1.1 Background

Quantifying ribosome occupancy correctly is the first step of analyzing the ribo-seq data. Measurements of protein translation efficiencies (Guo *et al.*, 2010), ribosome loads (Ingolia *et al.*, 2009), pileups and stalling (Ingolia *et al.*, 2011) are all derived from ribosome profiles. The challenges of generating such a profile includes deconvolving multi-mapped reads, selecting the correct codon location that the P-site maps to, and bias correction (Ingolia, 2014). While none of these issues has a standard protocol, we describe Ribomap, an automatic pipeline that addresses the above challenges and outputs isoform-level ribosome profiles and other ribo-seq analyses.

Current approaches to ribo-seq analysis either discard ambiguously mapped reads (Ingolia *et al.*, 2009; Guo *et al.*, 2010; Oh *et al.*, 2011; Thoreen *et al.*, 2012) or randomly assign them to one of the candidate regions (Rooijers *et al.*, 2013; McManus *et al.*, 2014). Such approaches can result in an inaccurate estimation of the ribosome profiles. For example, regions without estimated ribosome footprints are indistinguishable from read-free regions caused by discarded multi-mapping reads. Moreover, randomly assigned reads might cause some regions to have a faulty peak in the profile, while leaving other regions footprint-free (Supplementary Figure 1). Reads are therefore generally mapped to genes by choosing a single isoform (Guo *et al.*, 2010), or by using the union of all possible exons (Olshen *et al.*, 2013; Stumpf *et al.*, 2013; Dana and Tuller, 2014). Although there is a pipeline built to process ribo-seq reads for identifying protein sequences (Crappe *et al.*, 2014), a method proposed to resolve multi-mapping problems caused by repetitive sequences (Dana and Tuller, 2012) and software developed to align short reads to splice junctions (Michel *et al.*, 2014), none of these approaches so far handles multi-mapping problems caused by alternative splicing, which, as is shown in the main text and is further shown here in Supplementary Figure 2, is the major cause of ambiguous mappings. Without dealing with such source of multi-mappings, the current approaches can only be used to estimate the overall ribosome abundance of a given gene, and are incapable of estimating ribosome profile of different mRNA isoforms. These simplistic approaches can also lead to incorrect gene-level estimates — see Supplementary Figure 3.

The better assignment mechanism described here results in a more precise estimation of the per-mRNA ribosome profiles. And a better estimation of the ribosome profiles can also lead to a better estimation of the total ribosome loads. Even for the case of the mouse data from Ingolia *et al.* (2011), where approximately only 50% of the reads have multi-mappings, the estimated ribosome loads correlate better to the estimated transcript abundance (Pearson  $r=0.56$ ) than the naïve Star prime approach (Pearson  $r=0.45$ ). We believe a better estimation of the isoform level ribosome profiles can lead to a better understanding of translational regulation.

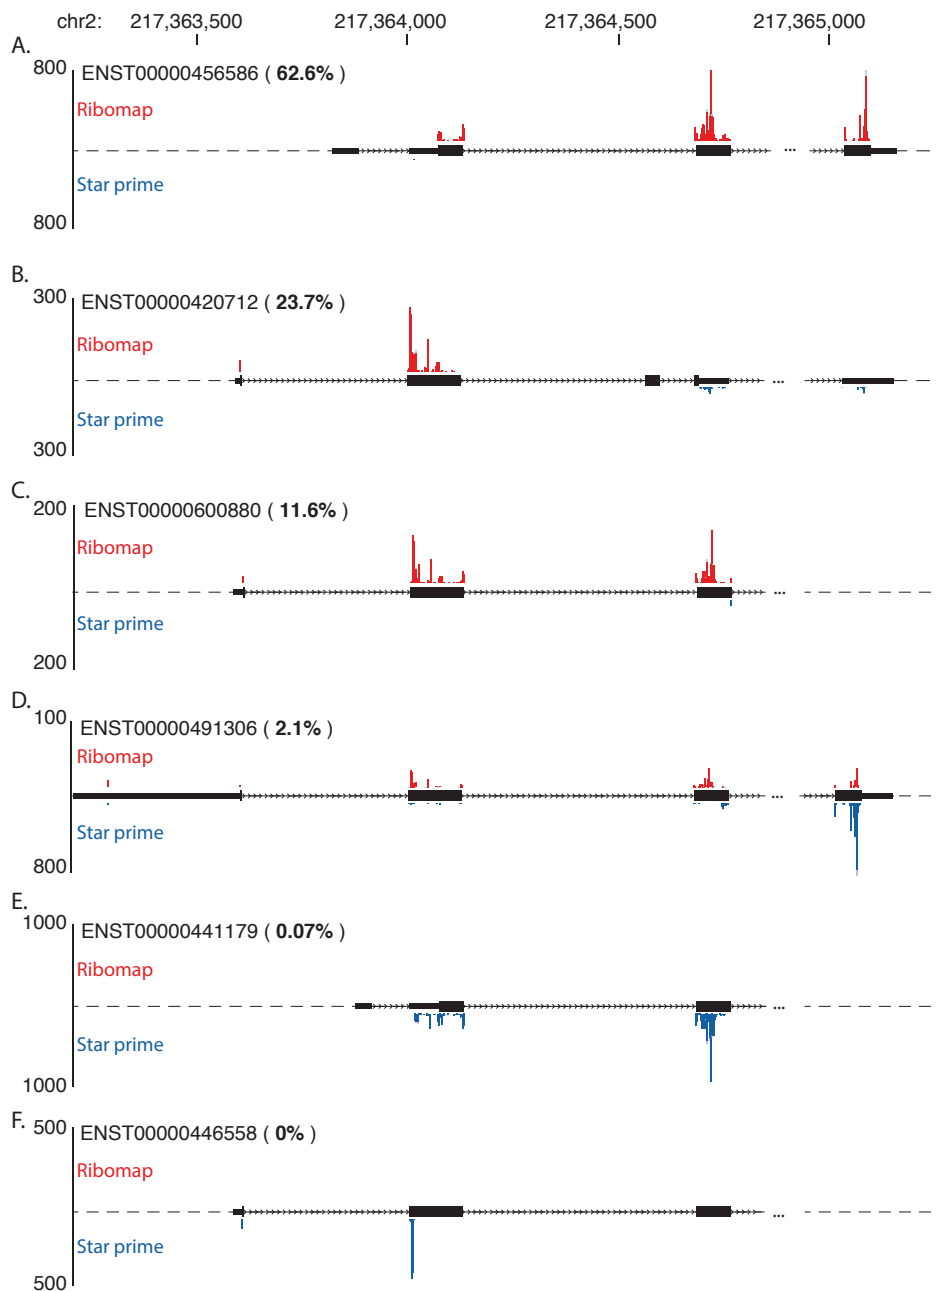

**Supplementary Figure 1.** An example of isoform level ribosome profiles for gene RPL37A (ENSG00000197756.5) produced by Ribomap and Star Prime on the HeLa cell data (GSM546920) from Guo *et al.* (2010). The isoforms are listed in order of their relative abundance (value shown next to the transcript ID) estimated from Sailfish (Patro *et al.*, 2014), and the isoform diagram is shown in between the Ribomap profile and Star prime profile. While Ribomap maps the footprints to the more abundant transcripts, Star prime assigns footprint reads to a single candidate location at random, leaving two of the expressed transcripts almost ribosome-free (A, C), two of the unexpressed transcripts with the highest ribosome loads (E, F), and a surprisingly huge pile-up at the end of transcript ENST00000491306, inconsistent with its surrounding ribosome pile-ups (D). Profile plot is shown in UCSC Genome Browser (Kent *et al.*, 2002).

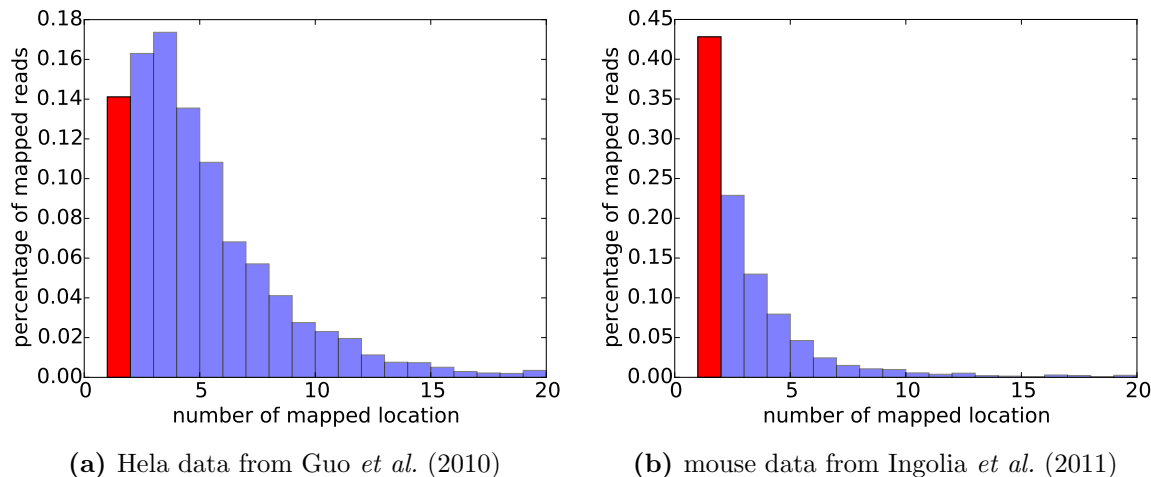

**Supplementary Figure 2.** Histogram of the number of mappings for all mapped ribo-seq reads in two data sets. Reads are mapped to the human and mouse transcriptome respectively. The proportion of uniquely mapped reads are marked in red. More than 50% of the reads in both data sets are ambiguous mapped, and ambiguous mappings are extremely common in Human reads. Even for the mouse data, where ambiguous mappings is less prevalent, 68% of the multi-mappings are caused by alternative splicing.

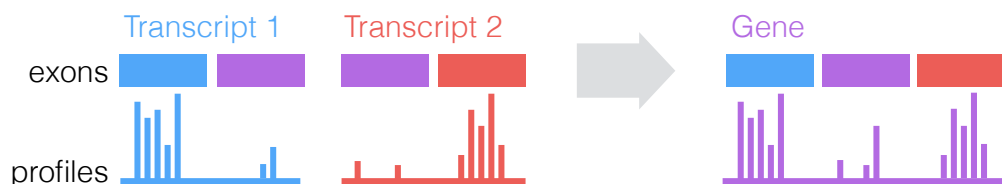

**Supplementary Figure 3.** An illustration of when estimating ribosome profile on a gene level will fail. One such case is the pileup does not happen in all isoforms, where merging the isoform-level profile will result in multiple peaks being present simultaneously. Another case is that the pileup in an exon location is not significant in any isoforms, but accumulating them together might produce a faulty peak.

## 1.2 Rationale of the Ribomap footprint assignment scheme

For a ribosome footprint read to come from a transcript location two conditions must hold: first, the transcript has to be present in the cell; second, a ribosome has to be translating the current codon. Therefore, in order to quantify the observed ribosome pileup, we make the following two assumptions: First, identical transcripts have identical translation dynamics; second, each codon location shares a unique pileup behavior due to how fast the current codon can be elongated and the surrounding codon pileups. This means the final observation of the number of ribosome footprints  $c_{mi}$  from transcript  $m$  at location  $i$  is proportional to both the chances of observing the specific transcript codon fragment in the cell  $\alpha_m$  (transcript abundance per base) and the chances of a ribosome occupying such a codon location  $p_{mi}$  given that the ribosome is from this transcript:  $c_{mi} \propto \alpha_m \times p_{mi}$ .

The transcript abundance can be estimated from the RNA-seq reads. However, there is no prior knowledge of the per-codon-location specific pileup. We therefore assume the per-codon ribosome abundance is uniformly unbiased. This leads to the assumption that the final ribosome abundance

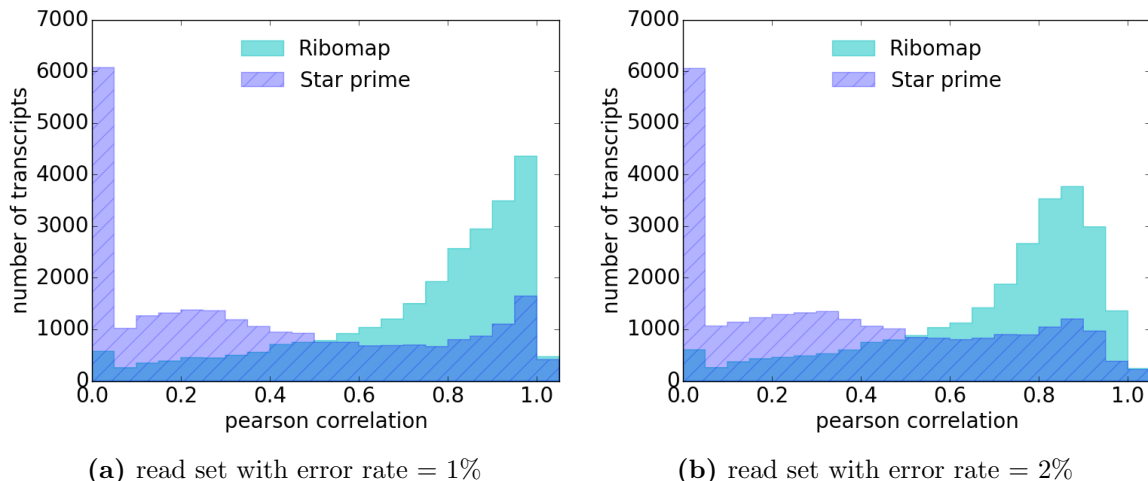

**Supplementary Figure 4.** Histogram of the Pearson correlation between the footprint assignments and the ground truth ribosome profiles on read sets with different error rates. Ribomap has a significantly higher Pearson correlation than Star prime (Mann-Whitney-U  $p < 3 \times 10^{308}$  for both cases). For synthetic set with error rate 1%, the median Pearson correlation is 0.81 for Ribomap and 0.30 for Star prime; for synthetic set with error rate 2%, the median Pearson correlation is 0.78 for Ribomap and 0.31 for Star prime.

of a transcript location is determined by the transcript abundance:  $c_{mi} \propto \alpha_m$ .

Intuitively, the transcript abundance is like the outline of the profile, and the location-specific ribosome abundance is like the detail of the profile. Our method tries to grasp the outline of the profile first and then let the read sequences themselves take care of the profile details.

### 1.3 Performance under various sequencing error rates

Supplementary Figure 4 gives the analog to Figure 1 in the manuscript, showing the distribution of Pearson correlations under various rates of sequencing error. See Section 3.4 for how these errors were introduced. Under reasonable error rates, the distributions are qualitatively the same.

### 1.4 Additional steps in Ribomap

The raw ribosome profiling reads and the RNA-seq reads are fed into the Ribomap analysis pipeline. Reads are first preprocessed by discarding contaminated reads and trimming the 3' adapter portion of the reads. The remaining reads are then aligned to the transcriptome to find all possible candidate mapping locations for all reads. The transcript abundances are also estimated from the RNA-seq reads. The last step of ribomap takes in the transcript abundance estimation and the read mappings, and produces a vector of read count per codon position for each transcript. The P-site location for each ribo-seq read are decided dynamically based on the read length. The sequencing bias in the ribosome profiles are corrected by normalizing a transcript's ribosome profile with its mRNA profile (as done in Artieri and Fraser (2014) and Zupanic *et al.* (2014)). A full description about Ribomap's output can be found in Section 2. The command to run Ribomap is:

```
run_ribomap.sh --rnaseq_fq rnaseq.fq.gz --riboseq_fq riboseq.fq.gz --contaminant_fa
contaminant.fa --transcript_fa transcript.fa --cds_range cds_range.txt
```

Ribomap uses state-of-the-art read-processing tools for several of its steps. We below list in detail each step of the Ribomap pipeline and the command for executing them, in case the user wants to skip some intermediate steps or make adjustments on individual steps.

#### 1.4.1 Using STAR aligner to filter out contaminating reads

Reads that can be mapped to rRNA, tRNA, snoRNA, may not be representative of ribosome protection *per se* and, in fact, may be contaminants merely associated with the ribosome. As such, they can be filtered out by mapping the reads to the ribosome RNA sequences and transfer RNA sequences of your organism and keeping only unmapped reads for downstream analysis. This is done via the STAR aligner (Dobin *et al.*, 2013).

The first step, which must be done only once per organism, is to create a STAR index for the contaminant RNA sequences with the following command, assuming the sequences of the unwanted molecules are in the file *contamination.fa*:

```
STAR --runThreadN nproc --runMode genomeGenerate
--genomeDir rrna_idx --genomeFastaFiles contamination.fa
--genomeSAindexNbases 5 --genomeChrBinNbits 11
```

*nproc* specifies the number of threads to run STAR. Since STAR treats every sequence entry in the reference FASTA as a ‘genome’, the option `--genomeSAindexNbases 5` forces STAR to build the index properly for small molecule sequences. We include both tRNA and rRNA sequences as contaminants in our analysis.

Once this index is created, it can be used to filter the contaminated reads as follows, assuming the zipped FASTQ file of raw sequencing reads is in *riboseq.fq.gz*:

```
STAR --runThreadN nproc --genomeDir rrna_idx --readFilesIn riboseq.fq.gz
--readFilesCommand zcat --outFileNamePrefix riboaligned
--outStd SAM --outReadsUnmapped Fastx --outSAMmode NoQS
--clip3pAdapterSeq adapter --seedSearchLmax 10
--outFilterMultimapScoreRange 0 --outFilterMultimapNmax 255
--outFilterMismatchNmax nmismatch
--outFilterIntronMotifs RemoveNoncanonical > /dev/null
```

where *adpater* is the adapter sequence (TCGTATGCCGTCTTCTGCTTG for the HeLa data set, and CTGTAGG CACCATCAATTTCGTATGCCGTCTTCTGCTTGAA for the mouse data set), and *nmismatch* = 1 is the number of allowed mismatches for the alignment. The option `--outReadsUnmapped Fastx` causes STAR to output the unmapped reads to a FASTA file called *riboalignedUnmapped.out.mate1*; `--seedSearchLmax 10` increases the sensitivity of STAR for aligning short reads; `--outFilterMultimapScoreRange 0` guarantees that only the alignments with the best scores are reported; `--outFilterMultimapNmax 255` filters out reads that can be mapped to more than 255 locations. STAR by default clips off read ends if a better local alignment score can be achieved. Such a procedure, called ‘soft clipping’, is very useful for handling ribo-seq reads since the first couple of bases in the 5’ end are likely to be contaminated, and an adapter sequence is usually attached to the 3’ end.

#### 1.4.2 Map the remaining reads to the transcriptome

After removing reads that may have been the result of contamination we are now ready to align the remaining reads to the transcriptome. This step is also accomplished by STAR. Assuming the transcriptome sequences are in *transcript.fa*, the command to generate the transcriptome index is:

```
STAR --runThreadN nproc --runMode genomeGenerate
--genomeDir transcript_idx --genomeFastaFiles transcript.fa
--genomeSAindexNbases 11 --genomeChrBinNbits 12
```

Again, `--genomeSAindexNbases 11` insures that the index is built properly for shorter molecules (compared to chromosomes), and `--genomeChrBinNbits 12` reduces the memory consumption when many reference sequences are provided.

The command to align the reads to the transcriptome is:

```
STAR --runThreadN nproc --genomeDir transcript_idx
--readFilesIn riboalignedUnmapped.out.mate1
--outFileNamePrefix riboaligned_transcript
--clip3pAdapterSeq adapter --seedSearchLmax 10
--outFilterMultimapScoreRange 0 --outFilterMultimapNmax 255
--outFilterMismatchNmax nmismatch
--outFilterIntronMotifs RemoveNoncanonical
--outSAMtype BAM Unsorted --outSAMmode NoQS
--outSAMattributes NH NM
```

The aligned reads will be stored in `riboaligned_transcriptAligned.out.bam`. It includes two SAM attributes for each alignment record: NH is the number of reported alignments for the read, and NM is the number of mismatches in the current alignment.

### 1.4.3 Transcript abundance calculation using Sailfish (Patro *et al.*, 2014)

The transcript abundance estimation is used to guide the isoform-level ribosome profile estimation. We are currently using the latest version of Sailfish (called Salmon) that supports the read alignment results as the input. Assuming that the read alignments of the RNA-seq data are in `rnaaligned_transcriptAligned.out.bam`, the command to perform the transcript abundance estimation is:

```
salmon quant -t transcript.fa -l SF -a rnaaligned_transcriptAligned.out.bam
-o sm_quant -p nproc --bias_correct
```

The flag `--bias_correct` allows Salmon to correct for sequencing biases in the RNA-seq reads. The transcript abundance estimation is in `sm_quant/quant_bias_corrected.sf`.

### 1.4.4 Isoform-level ribosome profile estimation

This is the last step of the Ribomap analysis pipeline, and it is automatically handled by an executable (developed by us) called `riboprof`. It takes in the transcriptome fasta file, a CDS range file, the ribo-seq and RNA-seq alignment bam files (produced above), the transcript abundance estimation file (produced as above; or it also supports abundance estimations from eXpress (Roberts and Pachter, 2013) or Cufflinks (Trapnell *et al.*, 2010) if those estimates are preferred and available). The CDS range file (assume its name is `cds_range.txt`) gives the coding region for each transcript. The command to perform an isoform-level ribosome profile estimation is:

```
riboprof --fasta transcript.fa --cds_range cds_range.txt
--mrnabam rnaaligned_transcriptAligned.out.bam
--ribobam riboaligned_transcriptAligned.out.bam
```

```

--min_fplen min_fplen --max_fplen max_fplen --offset offset.txt
--sf sm_quant/quant_bias_corrected.sf --tabd_cutoff tabd_cutoff
--out ribomap_out

```

Only reads with size (after ‘soft clipping’) between *min\_fplen*=25 and *max\_fplen*=36 are kept for estimating the ribosome profiles. Alignments with RC flag set (reads are reverse complemented and then aligned to the transcriptome) are discarded due to the single strandedness of the ribosome profile protocol. *offset.txt* provides the P-site offset of a read given the read length. Following Ingolia *et al.* (2011), we assign the P-site of reads with length < 30 to be 12, with length between 31 and 33 to be 13, and with length > 33 to be 14. Only transcripts with abundance greater than *tabd\_cutoff*=0 are considered to be expressed and are included for ribosome profile estimation.

There are three iterations in the footprint assignment procedure: First, only candidate locations with a frame-0 P-site mapping are considered; second, the remaining reads are assigned to frame 1 and 2 locations; third, the rest of the mapped reads – reads that cannot be mapped to any CDS regions, are mapped to UTR regions. For all three iterations, reads are mapped to candidate locations proportional to the transcript abundance if multiple locations are presented for one read.

The estimated ribosome profiles and other analysis will be written to the directory *ribomap\_out*.

More information about the options and input file formats for Ribomap can be found in the README file in Ribomap’s Github page (<https://github.com/Kingsford-Group/ribomap/blob/master/README.md>).

## 1.5 Settings of Star prime

By default, STAR only marks one alignment for multi-mapping reads as primary (FLAG 0x100 unset), such an alignment “is randomly selected from the alignments of equal quality.” And this primary alignment is used to estimate ribosome profiles in *Star prime*. In addition, no prior transcript abundance knowledge is used in *Star prime*, and therefore all transcripts in the transcriptome are taken into account. All other settings (i.e. contaminated read filtering, adapter clipping, read size selection, dynamic P-site assignment) are kept the same as the Ribomap pipeline described above.

## 1.6 Running time and memory usage of Ribomap

Ribomap runs for about 15 minutes on the ribo-seq data GSM546920 with 18 million reads on 15 threads. The running time includes the time to build the STAR index for both the contaminated sequences and the transcriptome, filtering the contaminated reads and aligning the remaining reads to the transcriptome for both RNA-seq and ribo-seq data, transcript abundance estimation, and estimating isoform level ribosome profiles. Memory usage is about 8.6G.

## 2. Output file format

In addition to estimated footprint count per codon position for each transcript isoforms, Ribomap also outputs sub-codon resolution, nucleotide-level ribosome profiles including the UTR regions. Furthermore, Ribomap reports ribosome loads, translation efficiency, and the relative abundance for each transcript. Lastly, Ribomap reports transcripts in order of the rank difference between the relative transcript abundance and ribosome load, to help identify isoforms with different translation efficiency.

Ribomap outputs five files:

File 1: `XXX.base` gives the sub-codon resolution, nucleotide-level ribosome profiles including the UTR regions. Only transcripts with a non-zero total ribosome count are reported. Each entry of a specific transcript looks like this:

```
refID: 0
tid: YAL001C
ribo profile: 0 0 0 74 68 ...
mRNA profile: 31 35 50 73 87 96 104 ...
normalized ribo profile: 0 0 0 1.0137 0.781609 0.0208333 0.125 ...
```

where:

**refID** is the transcript fai index in *transcript.fa*.

**tid** is the transcript header name in *transcript.fa*.

**ribo profile** nucleotide level ribosome profile including the UTR regions.

**mRNA profile** RNA-seq read coverage profile.

**normalized ribo profile** is the ribosome profile after bias correction. Each number in the vector is the ratio between the ribo profile count and the mRNA profile count.

File 2: `XXX.codon` gives the in-frame ribosome profiles for each transcript within the CDS region. The file format is the same as the `XXX.base` file.

File 3: `XXX.stats` is the summarized statistics for each transcript. Each entry of a specific transcript looks like this:

```
refID: 0
tid: YAL001C
rabd: 3959
tabd: 0.000209384
te: 1.89078e+07
```

where:

**rabd** is the total ribosome loads, which is the sum of the `ribo profile` vector in `XXX.base`.

**tabd** is the relative transcript abundance from Sailfish's result.

**te** is the relative translational efficiency, which is the ratio between `rabd` and `tabd`.

File 4: `XXX.abundant.list` gives a list of transcripts whose total ribosome abundance is more than expected given the transcript abundance. Such a list explores the difference between the ribosome abundance ranking and the transcript abundance ranking. A higher rank of total ribosome footprint count compared to the transcript abundance might indicate that the transcript is more highly packed with ribosomes and this might suggest that there is a translational amplification regulation for this transcript. Each line in the file looks like this:

```
ENST00000340756.2 2.81302e-09 1046.59 0 96 -96
```



It is the transcript header name followed by several statistics, in order:

1. relative transcript abundance,
2. total ribosome footprint count,
3. the percentile ranking of the transcript abundance,
4. the percentile ranking of the total ribosome loads (transcripts with zero total ribosome loads are excluded from the analysis),
5. difference between the transcript abundance rank and the total ribosome footprint count rank.

The list of entries in this file is ordered by the ranking difference between the transcript abundance and the ribosome abundance. Only transcripts with ranking differences greater than 10 are listed.

File 5: `XXX_scarce.list` gives a list of transcripts whose total ribosome abundance is less than expected given the transcript abundance. Analogous to the abundant list, this list include transcripts that might have a translational buffering regulation. The file format is the same as `XXX_abundant.list`.

### 3. Generating synthetic footprints

To evaluate the performance of the ribosome footprint read assignment, we generated synthetic footprint data with known ribosome profiles. Let  $N$  be the total number of transcripts,  $\alpha_m$  be the per-base relative abundance of a transcript  $m$ , and  $p_{mi}$  be the ribosome occupancy probability of a location  $i$  on transcript  $m$ . The number of synthetic footprints from location  $i$  on transcript  $m$  is set to be  $N \times \alpha_m \times p_{mi}$ , where  $N$  is set so that a total of 20,000,000 footprints from all locations of all transcripts are generated. How  $\alpha_m$  and  $p_{mi}$  are set is described below.

#### 3.1 Transcript abundance

The transcript abundance is estimated from the RNA-seq data paired with the ribosome profiling experiments (GSM546921) via Sailfish (Patro *et al.*, 2014). Only transcripts with TPM value (transcripts per million) greater than 1 are included, which results in a total of 39,414 transcripts. The relative transcript abundance per base  $\alpha_m$  is computed as follows: Let  $t_m$  be the transcript abundance estimated from Sailfish for transcript  $m$ , let  $l_m$  be the transcript length, let  $T$  be the transcriptome,  $\alpha_m = t_m / \sum_{m' \in T} t_{m'} \times l_{m'}$ .

The rationale of using transcript abundance per base for assigning the reads is that each transcript codon location can be seen as a type of ball with a unique color, and the probability of observing such a transcript codon fragment in the cell can be compared as randomly picking a ball of a specific color from a pool of balls. We assume codon locations on the same transcript have equal visibilities. For the extreme case where there is only one type of transcript in the cell with  $l_m$  bases, the probability of seeing any codons is  $1/l_m$ . For the case where there are more than one type of transcript, if there are  $t_m$  transcripts with type  $m$ , then there will be  $t_m$  copies of each codon positions, and the probability of seeing a specific codon position on transcript  $m$  over all possible codon positions is:  $t_m / \sum_{m' \in T} t_{m'} \times l_{m'}$ .

## 3.2 Ribosome occupancy probability

We model the movement of ribosomes on a given transcript with a ribosome flow model based on a total asymmetric exclusion process (TASEP) (Reuveni *et al.*, 2011). In this process, each mRNA is modeled as a sequence of codons, with ribosomes moving along it with codon-specific elongation rates. The model is “asymmetric” because the ribosome can only move from the 5’ end to the 3’ end of the mRNA. The model has “exclusion” because a location can only be occupied by one ribosome at a time; a ribosome can only move from location  $i$  to the next one when it is currently at location  $i$  and the next location is not occupied by another ribosome.

For a mRNA  $m$  of length  $n$ , the entire translation process is modeled in three steps: First, the ribosome binds to the the start codon of the mRNA with initiation rate  $\lambda_{m0}$ . Second, the ribosome moves along the mRNA from codon  $c_i$  to  $c_{i+1}$  with a elongation rate  $\lambda_{mi}$  ( $i = 1 \dots n - 1$ ). Third, the ribosome terminates when it reaches the the stop codon  $c_n$  with a termination rate  $\lambda_{mn}$ , and the whole peptide chain of the protein will be formed. The  $\lambda$  vector thus describes the transition rates of the ribosome moving from one location to another.

The model states, when given a transcript  $m$ , that the change of the probability of observing a ribosome on location  $i$  ( $p_{mi}$ ) is the difference between the incoming and the outgoing flow of the ribosome, modeled using the differential equations:

$$\frac{dp_{m1}(t)}{dt} = \lambda_{m0}[1 - p_{m1}(t)] - \lambda_{m1}p_{m1}[1 - p_{m2}(t)] \quad (1)$$

$$\frac{dp_{mi}(t)}{dt} = \lambda_{m,i-1}p_{m,i-1}(t)[1 - p_{mi}(t)] - \lambda_{mi}p_{mi}(t)[1 - p_{m,i+1}(t)] \quad 1 < i < n, \quad (2)$$

$$\frac{dp_{mn}(t)}{dt} = \lambda_{m,n-1}p_{m,n-1}(t)[1 - p_{m,n}(t)] - \lambda_{mn}p_{mn}(t) \quad (3)$$

Equation (1) and (3) describe the boundary case of the process, and equation (2) describes the intermediate case.

The ribosome profile under this model is the ribosome occupancy probability distribution when the steady state of the model is reached, during which the probability of observing a ribosome at any location will not change over time. This stationary distribution probability can be solved by setting the left hand side of the equations above to zero.

To generate synthetic profiles, we solve the above equations to find the steady state for all 39,414 transcripts. This profiles the probabilities  $p_{mi}$  that a read is drawn from location  $i$  on one copy of transcript  $m$ . Selection of the elongation rates ( $\lambda_{mi}$ ) and initiation rates ( $\lambda_{m0}$ ) is described below.

### 3.2.1 Elongation rate

Following Reuveni *et al.* (2011), we assume the elongation rate is codon-specific and is proportional to the tRNA abundance of a given codon. We use tRNA gene copy number as an approximation to the tRNA abundance in the cell, and we set the elongation rate to be the absolute adaptiveness value ( $W_i$ ) of a given codon  $i$ :

$$W_i = \sum_{j=1}^{n_i} (1 - S_{ij}) t_{CGN_{ij}}. \quad (4)$$

Here  $n_i$  is the number of tRNA isoacceptors recognizing codon  $i$ .  $t_{CGN_{ij}}$  is the gene copy number of the  $j$ th tRNA that recognizes the  $i$ th codon, and  $S_{ij}$  is the selective constraint on the efficiency of the codon-anticodon coupling by considering the wobble paring (dos Reis *et al.*, 2004). The

absolute adaptiveness of a given codon gives an estimate for the total amount of tRNAs that can match to a specific codon. The larger the adaptiveness value is, the more efficient a codon can be translated, and thus the faster the elongation rate will be. The elongation rates range between 3.5 and 33 time steps from this calculation.

### 3.2.2 Initiation rate

The initiation rate is thought to be the rate limiting step during the translation process (Ingolia *et al.*, 2009). We set the initiation rate range to be approximately 100 times smaller than the elongation rate as in Shah *et al.* (2013), and the rates are uniformly sampled for each transcript between 0.03 and 0.3 timesteps.

### 3.3 Ribosome footprint generation

We calculate  $\alpha_m$  and  $p_{mi}$  for every transcript as described above and then sample reads by selecting a random transcript with probability proportional to its  $\alpha_m$  and then selecting ribosome position  $i$  proportional to  $p_{mi}$ . We then extract a 30-bp read with the 12<sup>th</sup> position set to the ribosome P-site.

### 3.4 Introducing sequencing errors in the read set

We estimate the frequency of sequencing errors from ribosome profiling data (GSM546920 Guo *et al.* (2010)) to be the total number of mismatches of read assignments in the data over the total number of aligned bases (total number of aligned reads  $\times$  read length). The error rate estimated on the ribosome profiling data GSM546920 is 0.5%.

To add simulated sequencing errors to our simulated reads, we apply a Poisson process to choose the bases to mutate in the synthetic footprint read set with the rate parameter set to the error rate. We also tried different error rates (0.5%, 1%, 2%), which all produce similar results in the footprint assignments (Supplementary Figure 4). The histogram in the paper is generated from the data with error rate 0.5%.

### 3.5 RNA-seq data generation

We synthetically generated RNA-seq reads with the following procedure: The transcript abundance estimation from Section 3.1 is used as a prior to generate 20,000,000 synthetic RNA-seq fragments with default parameters using rlsim (Sipos *et al.*, 2013). Consistent with the ribosome footprint generation settings, only transcripts with TPM value (transcripts per million) greater than 1 are included. We then truncate the fragments into 36bp-long single-end reads.

When applying Ribomap, we re-estimate the transcript abundance as usual from the synthetic RNA-seq reads via Sailfish (Patro *et al.*, 2014) without looking at the original estimates from the true data.

The analysis shown in Figure 2 in the main text and in Supplementary Figure 4 only uses transcripts with non-zero total ribosome counts, which results in 26,297 transcripts included.

## 4. Data used in the experiments reported here

- **Hela ribosome footprint data:** Human Hela cell ribo-seq mock 32hr runs1-2 in Guo *et al.* (2010) (GSM546920).

- **Hela RNA-seq data:** Human HeLa cell RNA-seq mock 32hr runs1-3 in Guo *et al.* (2010) (GSM546921).
- **Human Transcriptome reference fasta file:** The human protein-coding transcriptome fasta file is downloaded from the Gencode website: ([ftp://ftp.sanger.ac.uk/pub/gencode/Gencode\\_human/release\\_18/gencode.v18.pc.transcripts.fa.gz](ftp://ftp.sanger.ac.uk/pub/gencode/Gencode_human/release_18/gencode.v18.pc.transcripts.fa.gz)). The CDS region information used in our analysis is obtained from the headers of the fasta sequence entries.
- **Human Transcriptome gene annotation gtf file:** The human gene annotation gtf is also downloaded from the Gencode website: ([ftp://ftp.sanger.ac.uk/pub/gencode/Gencode\\_human/release\\_18/gencode.v18.annotation.gtf.gz](ftp://ftp.sanger.ac.uk/pub/gencode/Gencode_human/release_18/gencode.v18.annotation.gtf.gz)). This file is used to obtain the frame information of the CDS regions of the transcripts.
- **Mouse Ribosome footprint data:** ES cell feeder-free, w/ LIF 60 s CYH (100 ug/ml) ribo\_mesc\_yeslif Illumina GAI in Ingolia *et al.* (2011) (GSM765301).
- **Mouse RNA-seq data:** ES cell feeder-free, w/ LIF 60 s CYH (100 ug/ml) mrna\_mesc\_yeslif Illumina GAI in Ingolia *et al.* (2011) (GSM765289).
- **Mouse Transcriptome reference fasta file:** The mouse protein-coding transcriptome fasta file is downloaded from the Gencode website: ([ftp://ftp.sanger.ac.uk/pub/gencode/Gencode\\_mouse/release\\_M4/gencode.vM4.pc.transcripts.fa.gz](ftp://ftp.sanger.ac.uk/pub/gencode/Gencode_mouse/release_M4/gencode.vM4.pc.transcripts.fa.gz)). The CDS region information used in our analysis is obtained from the headers of the fasta sequence entries.
- **Mouse Transcriptome gene annotation gtf file:** The mouse gene annotation gtf is also downloaded from the Gencode website: ([ftp://ftp.sanger.ac.uk/pub/gencode/Gencode\\_mouse/release\\_M4/gencode.vM4.annotation.gtf.gz](ftp://ftp.sanger.ac.uk/pub/gencode/Gencode_mouse/release_M4/gencode.vM4.annotation.gtf.gz)). This file is used to obtain the frame information of the CDS regions of the transcripts.
- **Human tRNA gene copy number:** Downloaded from the gtrna database (Chan and Lowe, 2009): (<http://gtrnadb.ucsc.edu/Hsapi/Hsapi-summary-codon.html>).
- **Contaminated sequences:** Both ribosomal sequences and tRNA sequences are included in the contaminated sequences. Ribosomal sequences are downloaded from Ensemble's (Flicek, Paul and Ahmed *et al.*, 2013) ncRNA database with `gene_biotype` as `rRNA`; tRNA sequences are downloaded from the gtrna database (Chan and Lowe, 2009) (<http://gtrnadb.ucsc.edu/download/tRNAs/eukaryotic-tRNAs.fa.gz>).

## References

- Artieri, C. G. and Fraser, H. B. (2014). Accounting for biases in riboprofiling data indicates a major role for proline in stalling translation. *Genome Res.*, **24**(12), 2011–2021.
- Chan, P. P. and Lowe, T. M. (2009). GtRNAdb: a database of transfer RNA genes detected in genomic sequence. *Nucleic Acids Res.*, **37**(Database issue), D93–D97.
- Crappe, J. *et al.* (2014). PROTEOFORMER: deep proteome coverage through ribosome profiling and MS integration. *Nucleic Acids Res.*
- Dana, A. and Tuller, T. (2012). Determinants of translation elongation speed and ribosomal profiling biases in mouse embryonic stem cells. *PLoS Comput Biol.*, **8**(11), e1002755.
- Dana, A. and Tuller, T. (2014). The effect of tRNA levels on decoding times of mRNA codons. *Nucleic Acids Research*, **42**(14), 9171–9181.
- Dobin, A. *et al.* (2013). STAR: ultrafast universal RNA-seq aligner. *Bioinformatics*, **29**(1), 15–21.
- dos Reis, M., Savva, R., and Wernisch, L. (2004). Solving the riddle of codon usage preferences: a test for translational selection. *Nucleic Acids Res.*, **32**(17), 5036–5044.
- Flicek, Paul and Ahmed *et al.* (2013). Ensembl 2013. *Nucleic Acids Research*, **41**(D1), D48–D55.
- Guo, H. *et al.* (2010). Mammalian microRNAs predominantly act to decrease target mRNA levels. *Nature*, **466**(7308), 835–840.
- Ingolia, N. T. (2014). Ribosome profiling: new views of translation, from single codons to genome scale. *Nat. Rev. Genet.*, **15**(3), 205–213.
- Ingolia, N. T. *et al.* (2009). Genome-wide analysis *in vivo* of translation with nucleotide resolution using ribosome profiling. *Science*, **324**(5924), 218–223.
- Ingolia, N. T., Lareau, L. F., and Weissman, J. S. (2011). Ribosome profiling of mouse embryonic stem cells reveals the complexity and dynamics of mammalian proteomes. *Cell*, **147**(4), 789–802.
- Kent, W. J., Sugnet, C. W., Furey, T. S., Roskin, K. M., Pringle, T. H., Zahler, A. M., and Haussler, D. (2002). The human genome browser at UCSC. *Genome Research*, **12**(6), 996–1006.
- McManus, C. J., May, G. E., Spealman, P., and Shteyman, A. (2014). Ribosome profiling reveals post-transcriptional buffering of divergent gene expression in yeast. *Genome Research*, **24**(3), 422–430.
- Michel, A. M., Fox, G., M. Kiran, A., De Bo, C., OConnor, P. B. F., Heaphy, S. M., Mullan, J. P. A., Donohue, C. A., Higgins, D. G., and Baranov, P. V. (2014). GWIPS-viz: development of a ribo-seq genome browser. *Nucleic Acids Research*, **42**(D1), D859–D864.
- Oh, E., Becker, A. H., Sandikci, A., Huber, D., Chaba, R., Gloge, F., Nichols, R. J., Typas, A., Gross, C. A., Kramer, G., Weissman, J. S., and Bukau, B. (2011). Selective ribosome profiling reveals the cotranslational chaperone action of trigger factor *in vivo*. *Cell*, **147**(6), 1295–1308.
- Olshen, A. B. *et al.* (2013). Assessing gene-level translational control from ribosome profiling. *Bioinformatics*, **29**(23), 2995–3002.

- Patro, R. *et al.* (2014). Sailfish enables alignment-free isoform quantification from RNA-seq reads using lightweight algorithms. *Nat. Biotechnol.*, **32**(5), 462–464.
- Reuveni, S. *et al.* (2011). Genome-scale analysis of translation elongation with a ribosome flow model. *PLoS Comput. Biol.*, **7**(9), e1002127.
- Roberts, A. and Pachter, L. (2013). Streaming fragment assignment for real-time analysis of sequencing experiments. *Nat. Methods*, **10**(1), 71–73.
- Rooijers, K., Loayza-Puch, F., Nijtmans, L. G., and Agami, R. (2013). Ribosome profiling reveals features of normal and disease-associated mitochondrial translation. *Nat Commun*, **4**, 2886.
- Shah, P., Ding, Y., Niemczyk, M., Kudla, G., and Plotkin, J. B. (2013). Rate-limiting steps in yeast protein translation. *Cell*, **153**(7), 1589–1601.
- Sipos, B., Slodkowitz, G., Massingham, T., and Goldman, N. (2013). Realistic simulations reveal extensive sample-specificity of RNA-seq biases. *arXiv preprint arXiv:1308.3172*.
- Stumpf, C. R., Moreno, M. V., Olshen, A. B., Taylor, B. S., and Ruggero, D. (2013). The translational landscape of the mammalian cell cycle. *Molecular Cell*, **52**(4), 574–582.
- Thoreen, C. C. *et al.* (2012). A unifying model for mTORC1-mediated regulation of mRNA translation. *Nature*, **485**(7396), 109–113.
- Trapnell, C. *et al.* (2010). Transcript assembly and quantification by RNA-Seq reveals unannotated transcripts and isoform switching during cell differentiation. *Nat. Biotechnol.*, **28**(5), 511–515.
- Zupanic, A., Meplan, C., Grellscheid, S. N., Mathers, J. C., Kirkwood, T. B., Hesketh, J. E., and Shanley, D. P. (2014). Detecting translational regulation by change point analysis of ribosome profiling data sets. *RNA*, **20**(10), 1507–1518.
